# Supplementary material
Source: Research Square preprint supplement (doi:10.21203/rs.3.rs-8922369/v1)
Supplement: Supplementary file 1 [file 6e320b4c4f8043a13d9fd19b.docx]

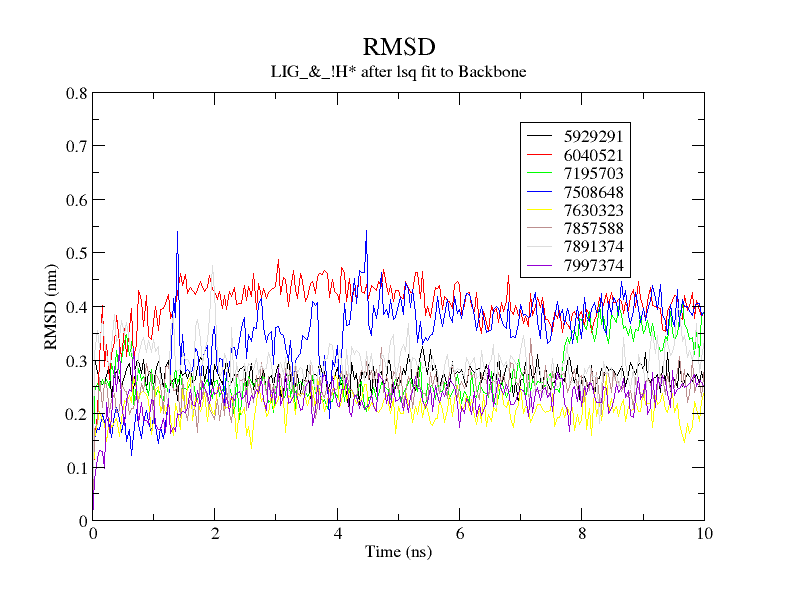


**Fig. S1**: Ligand RMSD of compounds selected by secondary screening


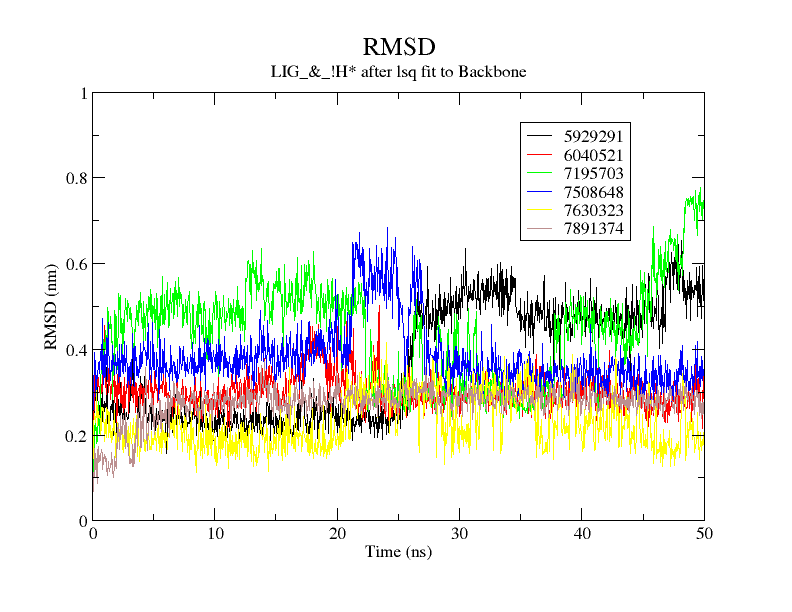


**Fig. S2**: Ligand RMSD of compounds selected by tertiary screening

**Table S1**: Mean binding free energy (DGmean) and max binding free energy (DGmax) of each compound (kcal/mol)

| ID | DGmean | DGmax |
| --- | --- | --- |
| 7891374 | -12.95 | -0.62 |
| 5929291 | -18.25 | 4.86 |
| 6040521 | 0.57 | 16.61 |
| 7195703 | -14.20 | -1.13 |
| 7630323 | -9.18 | 8.9 |
| 7508648 | -5.49 | 10.95 |

**Table S2**: Average ligand RMSD (nm) of final candidate compounds

| ID | run 1 | run 2 | run 3 |
| --- | --- | --- | --- |
| 7891374 | 0.2733 | 1.3792 | 0.7193 |
| 7195703 | 0.3665 | 0.4711 | 0.2507 |


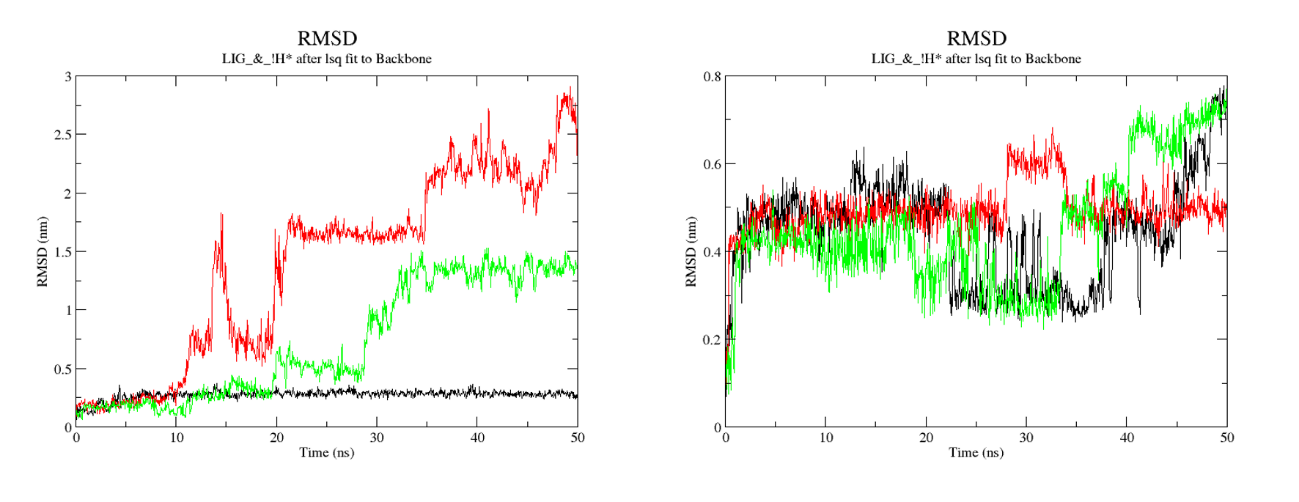


**Fig. S3**: Average ligand RMSD of 7891374 (left) and 7195703 (right)

**Table S3**: Selected compounds

| name | ID | IUPAC |
| --- | --- | --- |
| Compound 1 | 7195703 | N-(3-chloro-4-methoxyphenyl)-2- [(5-methoxy-1H-benzimidazol-2- yl)thio]acetamide |


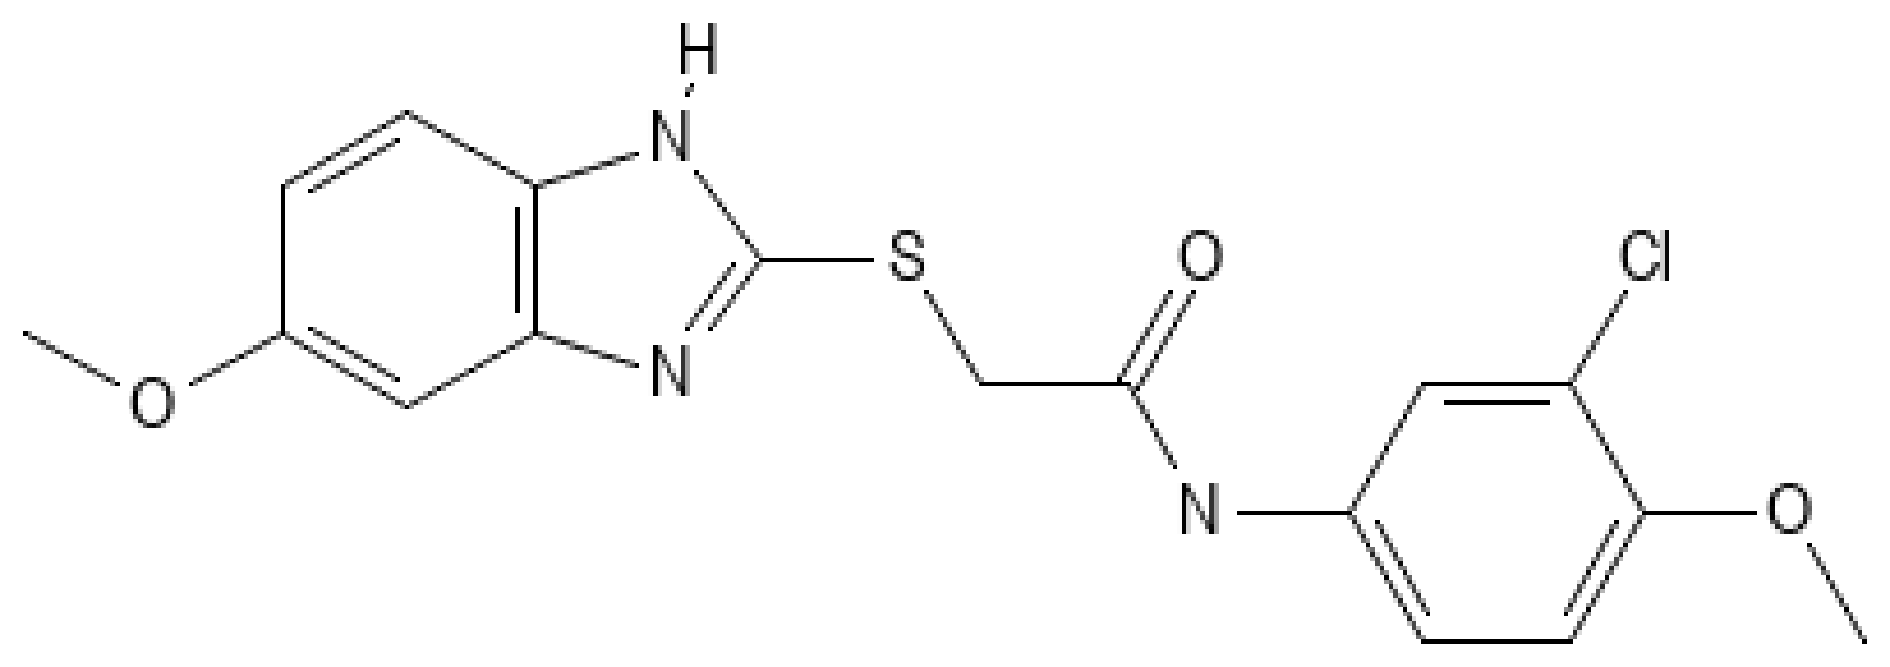


**Fig. S4**: Structure of Compound 1


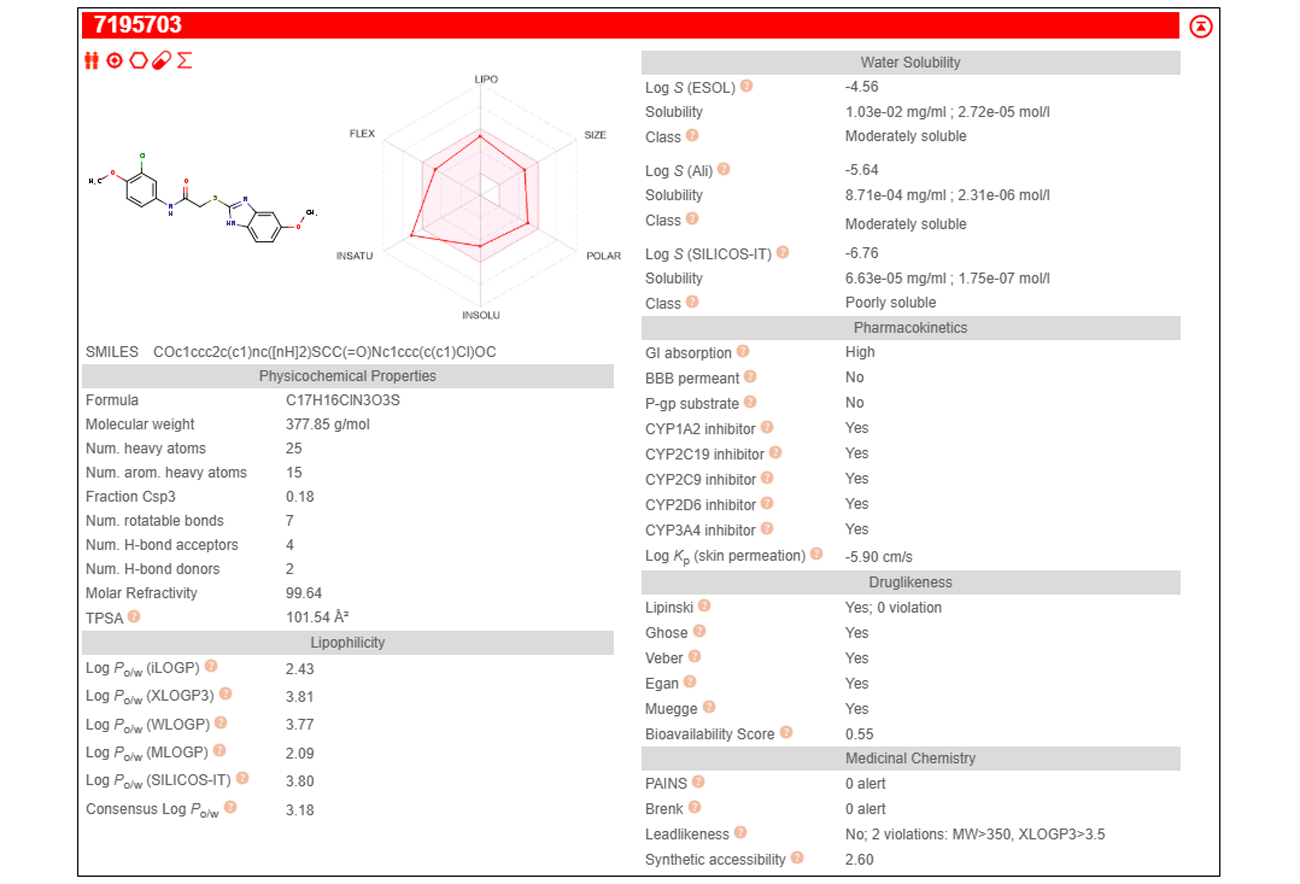


**Fig. S5**: Drug-likeness analysis of 7195703


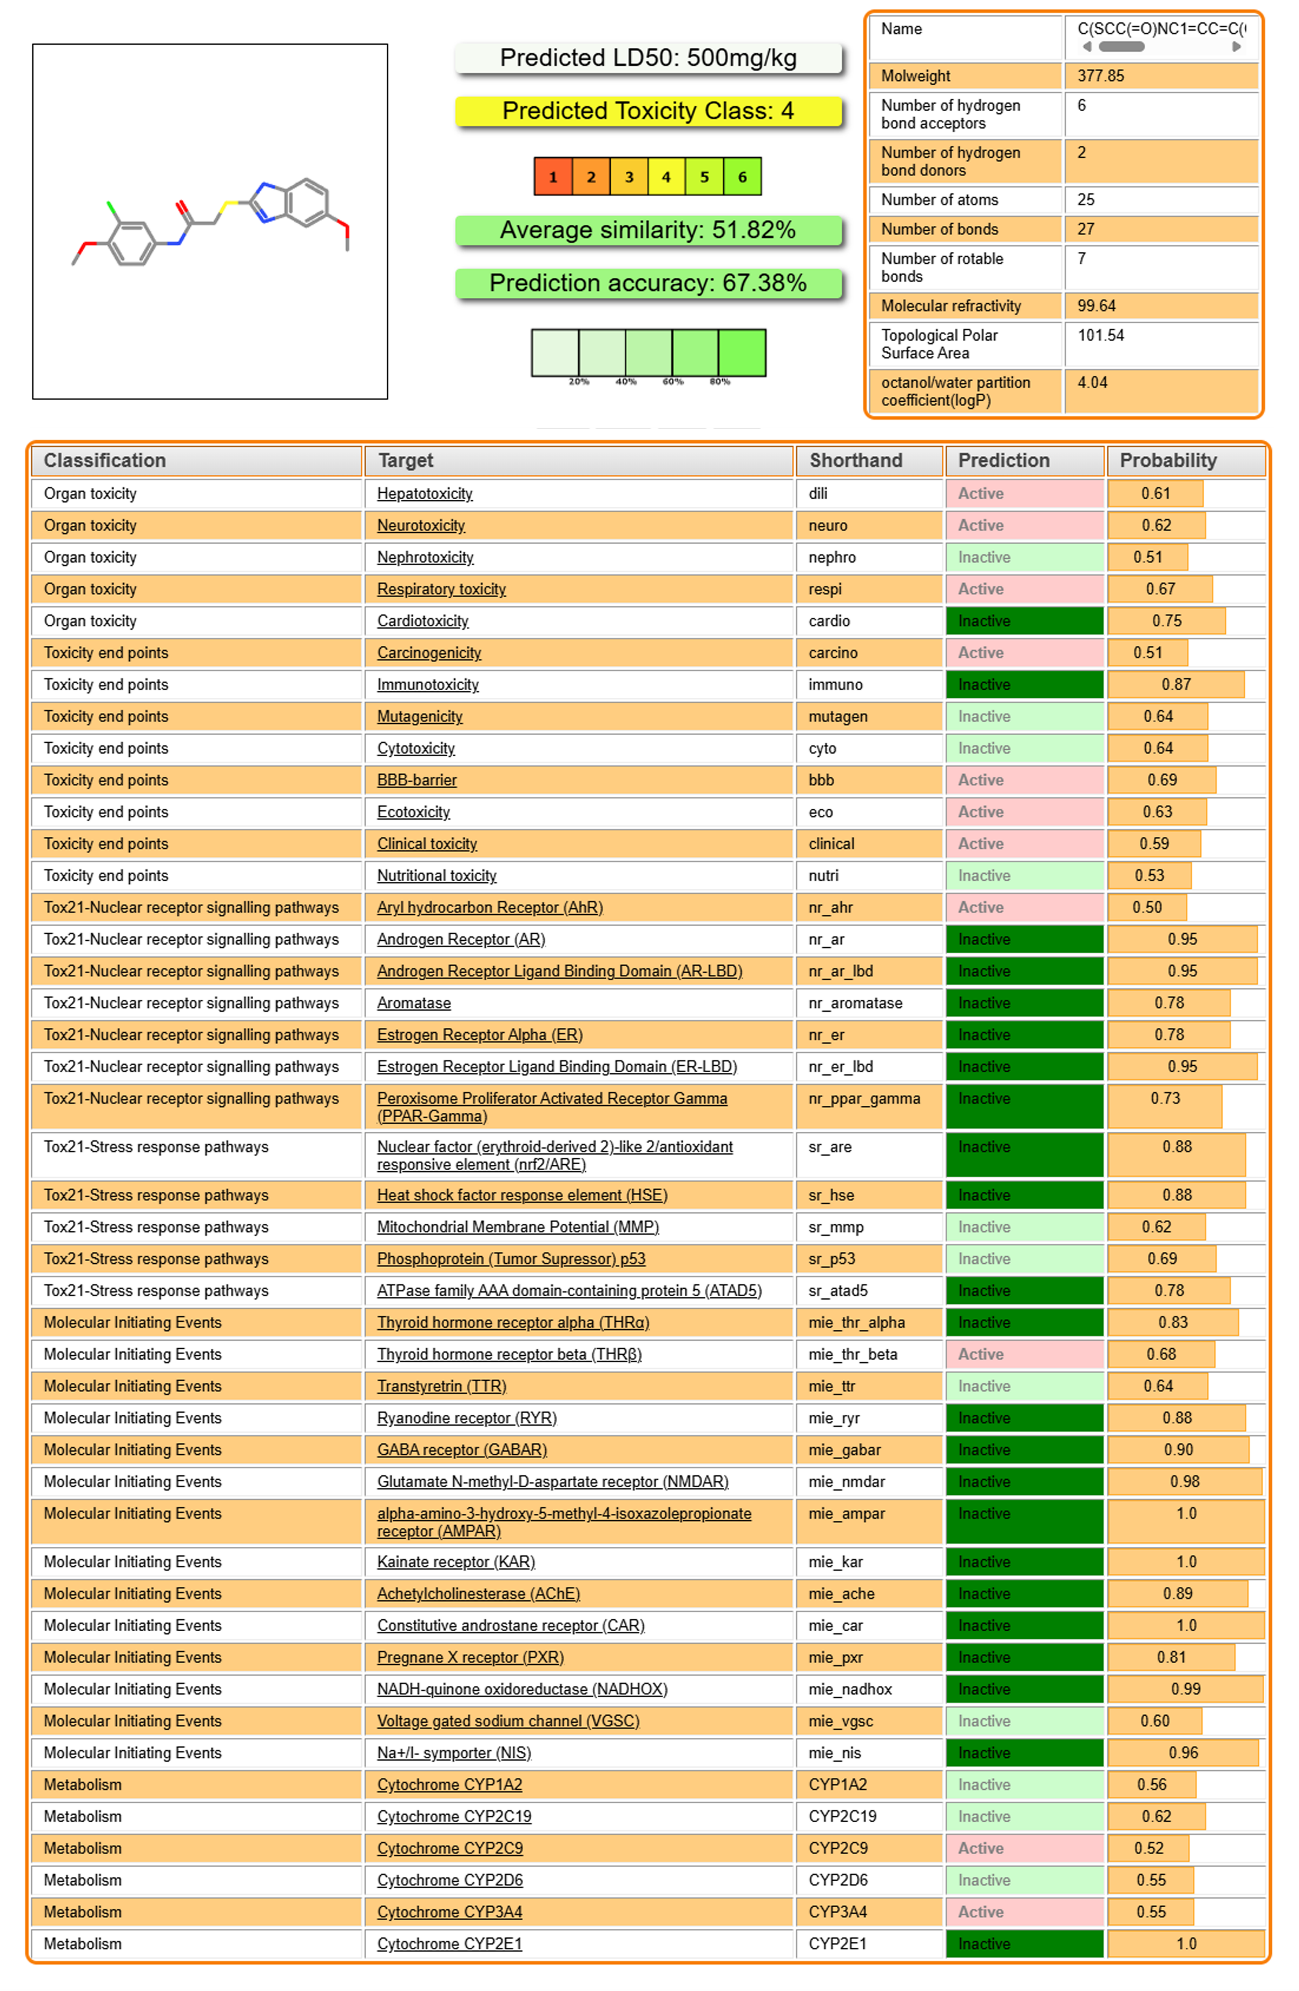


**Fig. S6**: Toxicity Prediction of 7195703

**Table S4**: Chemical Structures of 7195703 Analogues

| PubChem CID | Structure |
| --- | --- |
| 135476455 | 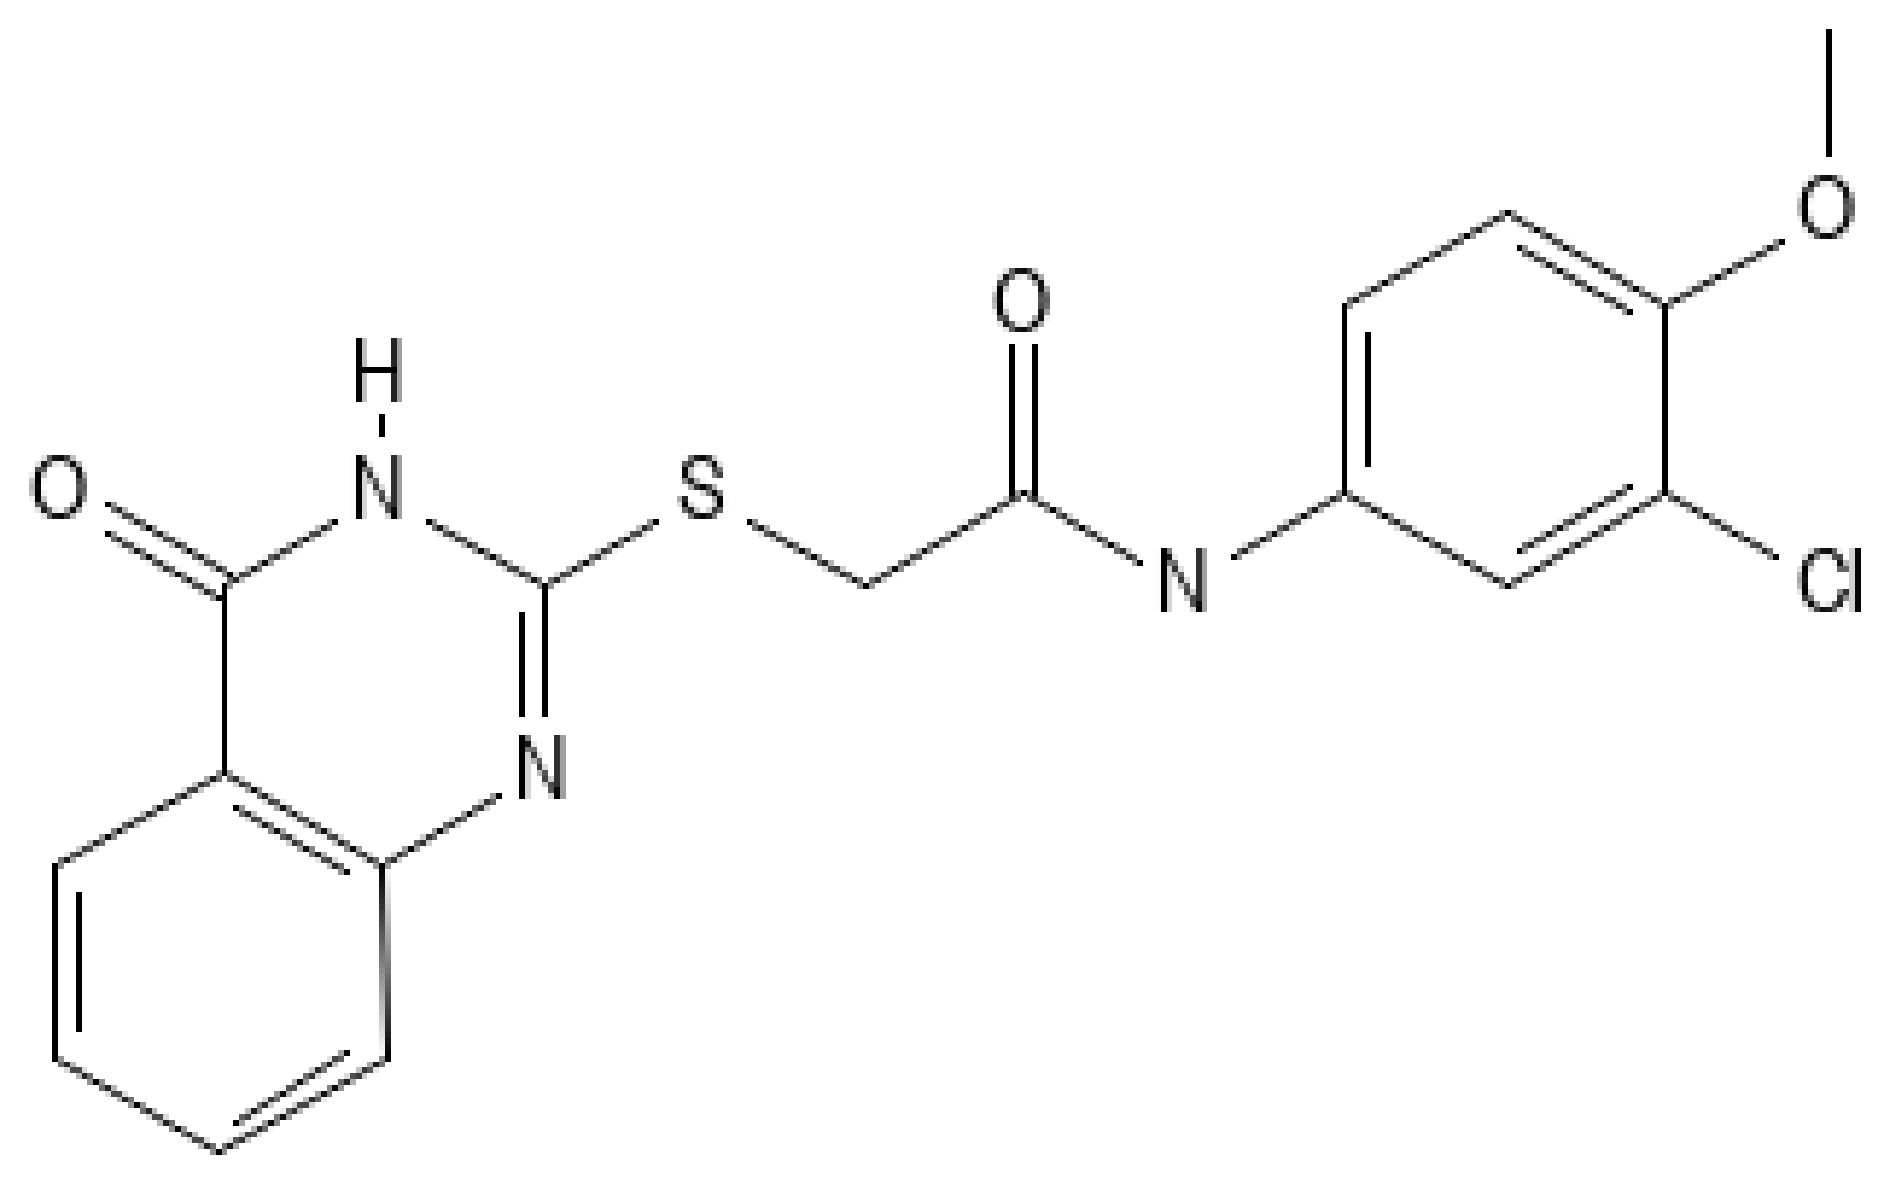 |
| 2166318 | 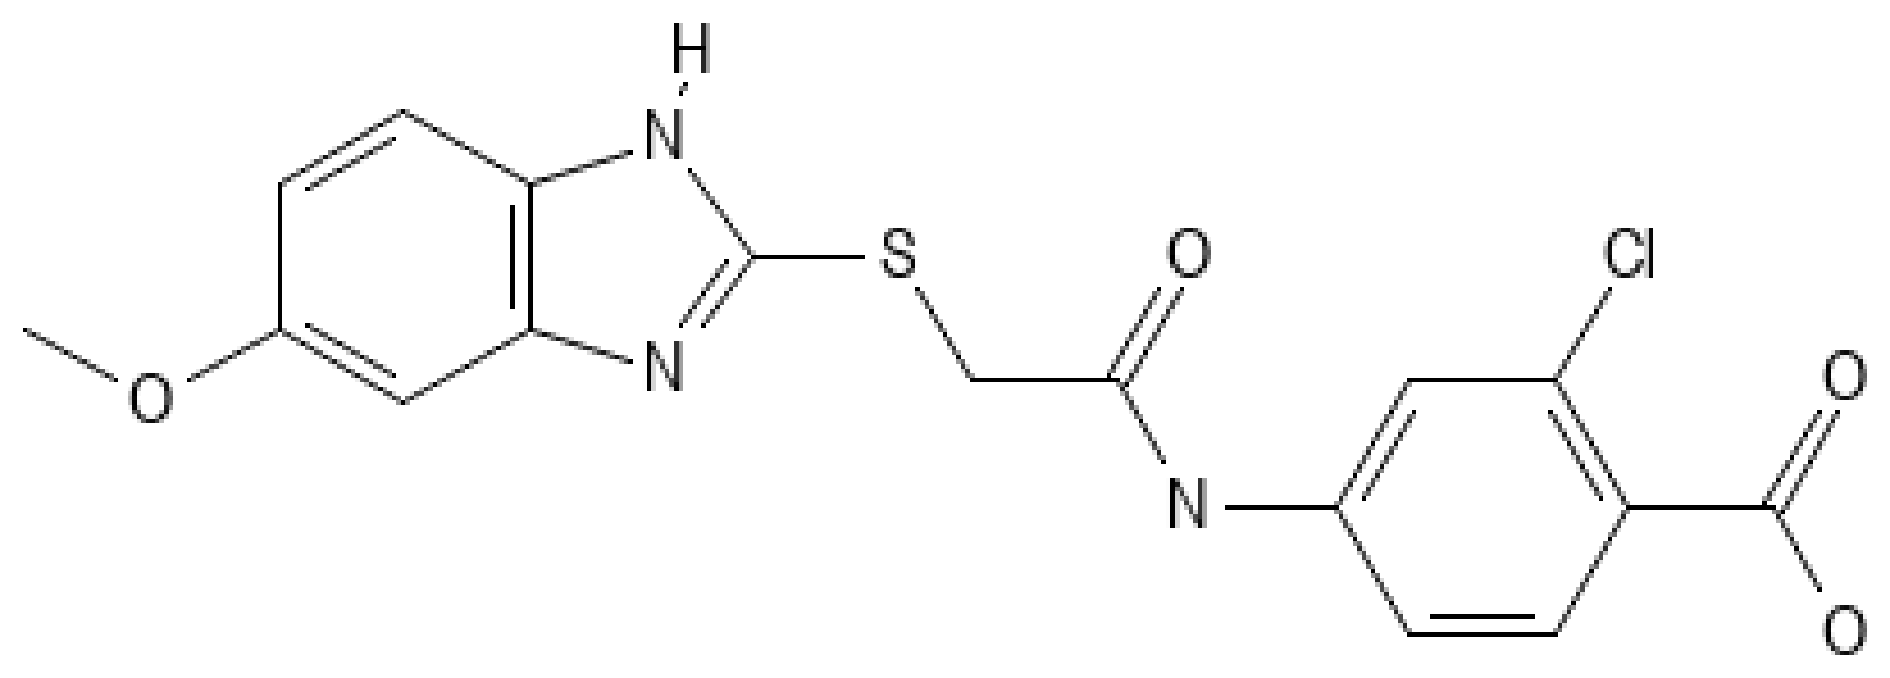 |
| 2987305 | 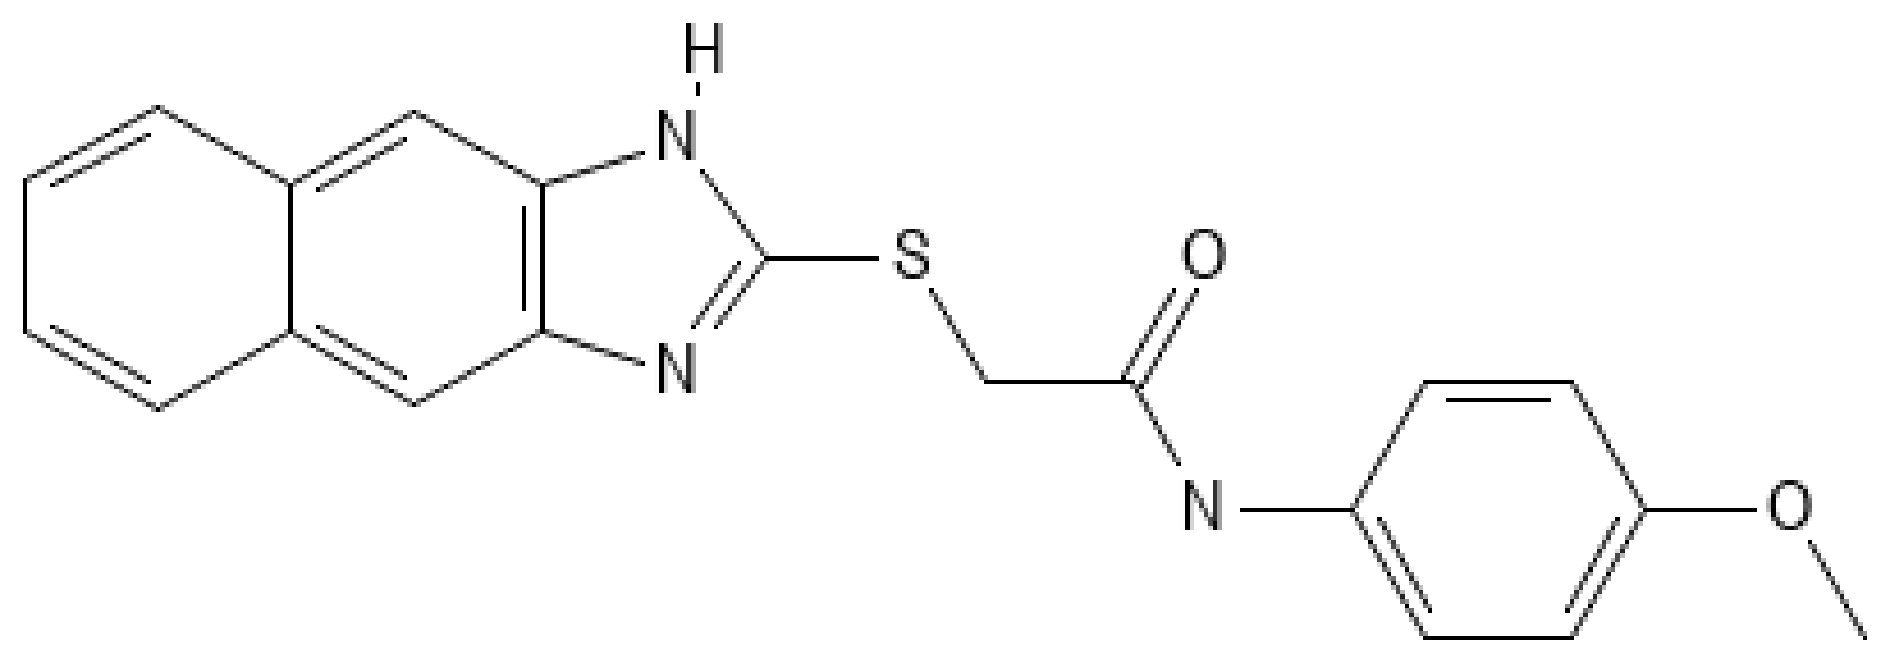 |
| 2274941 | 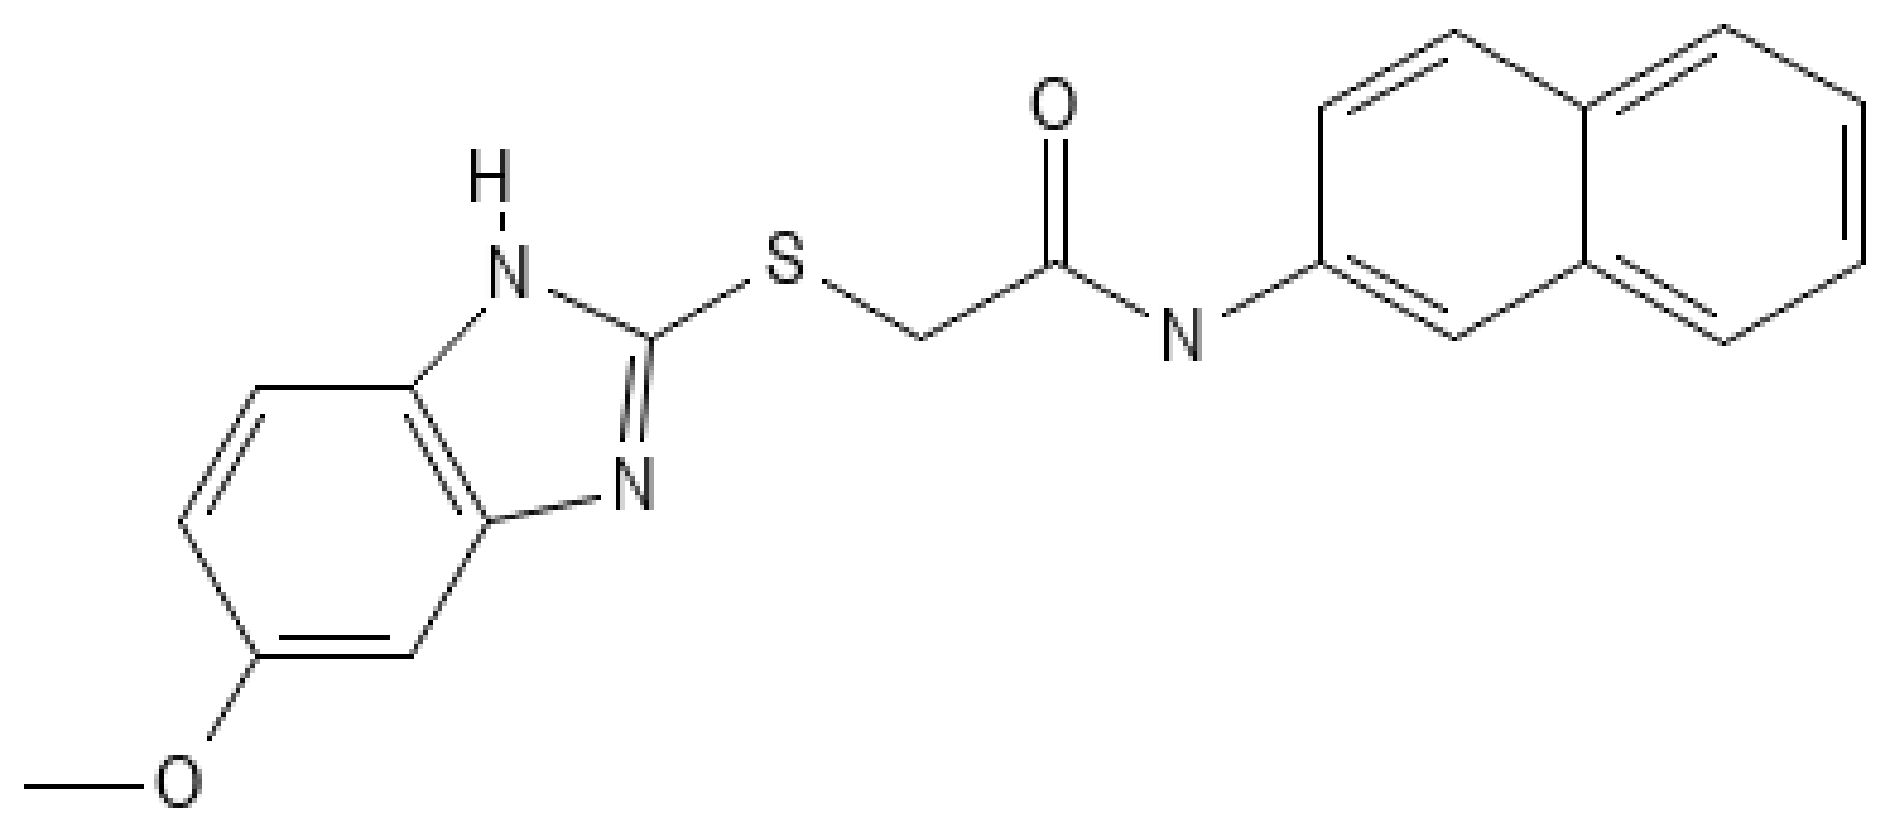 |
| 2302155 | 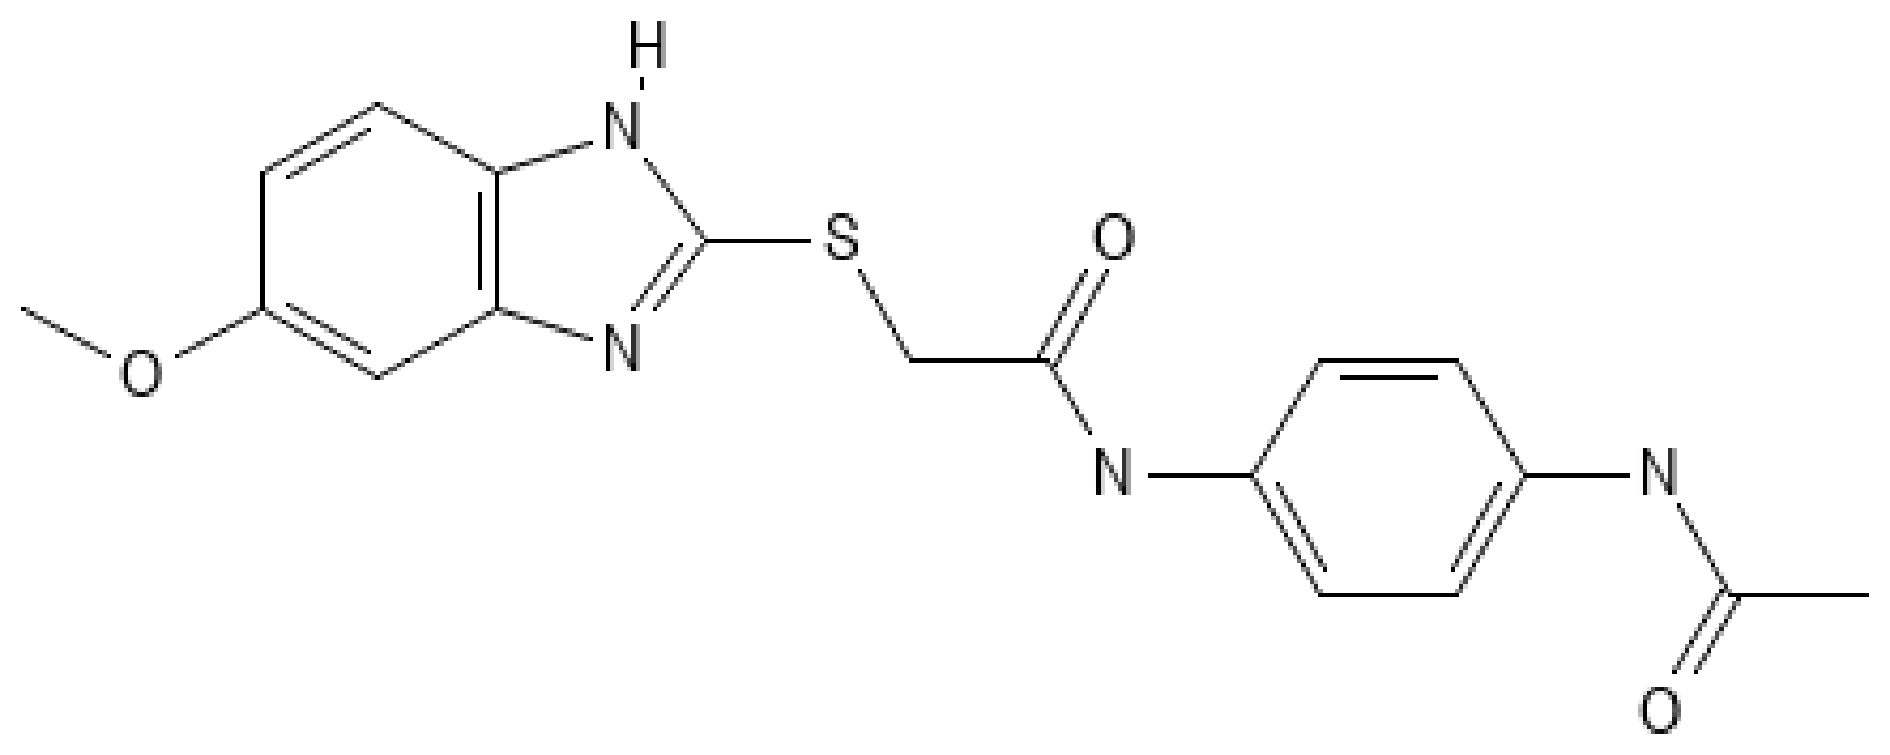 |


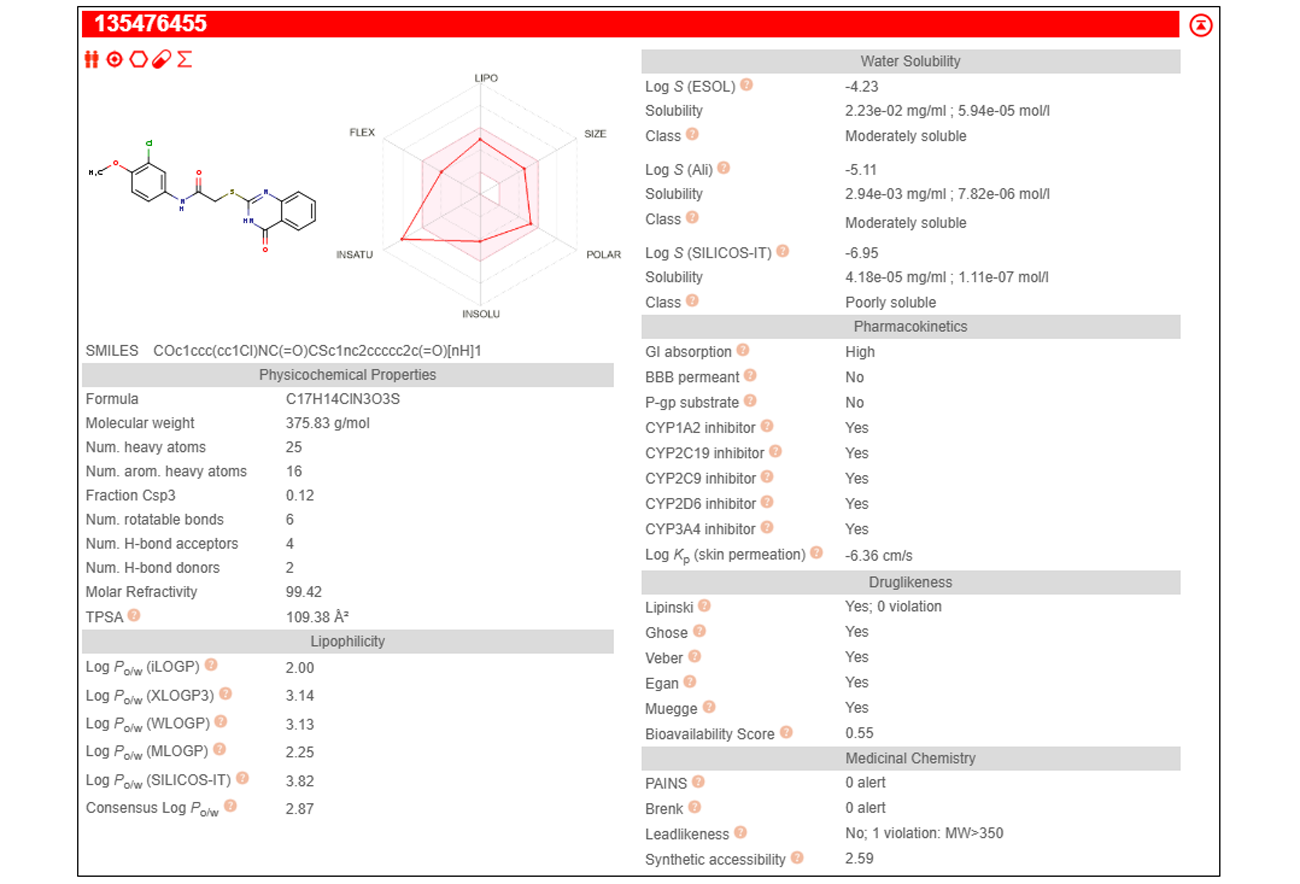


**Fig. S7**: Drug-likeness analysis of 135476455


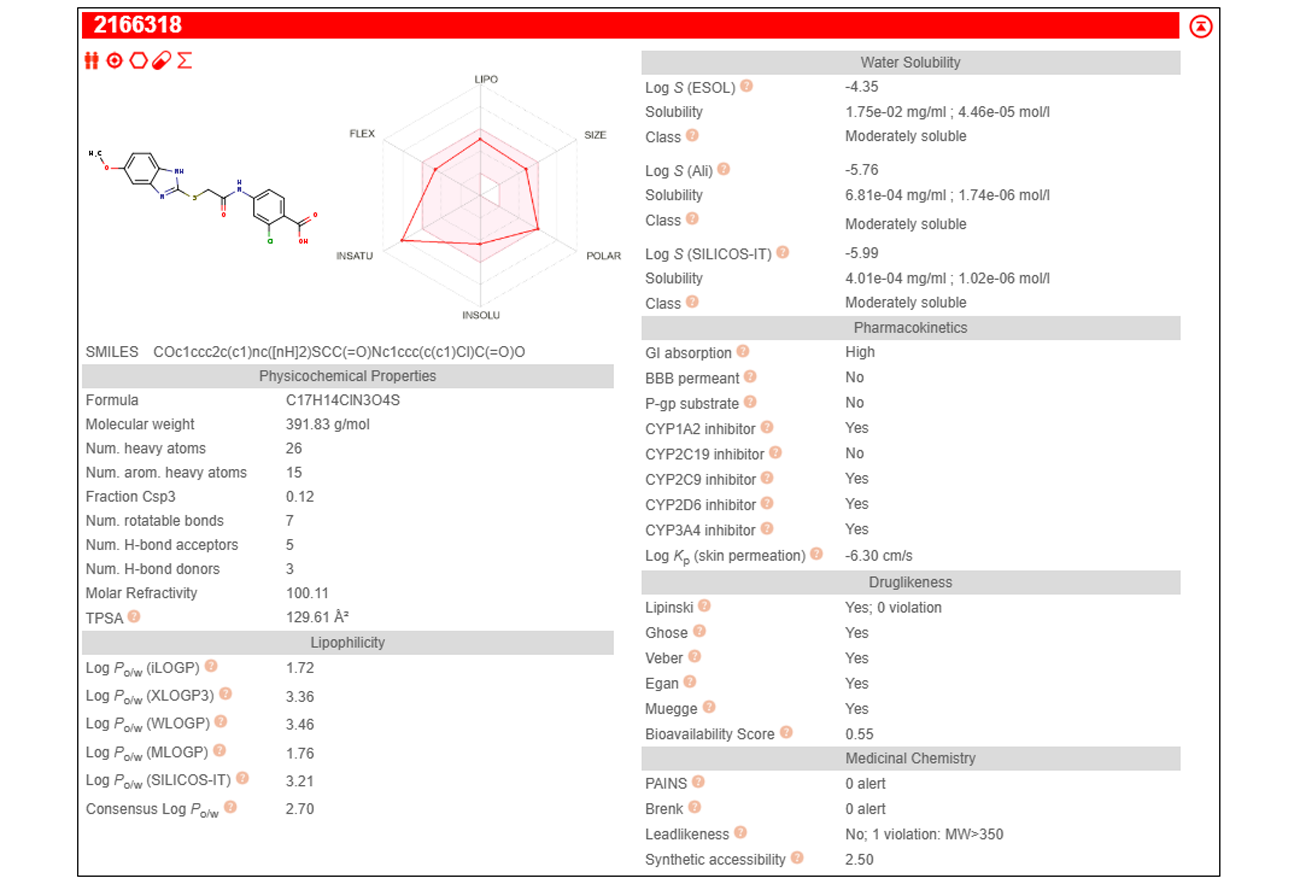


**Fig. S8**: Drug-likeness analysis of 2166318


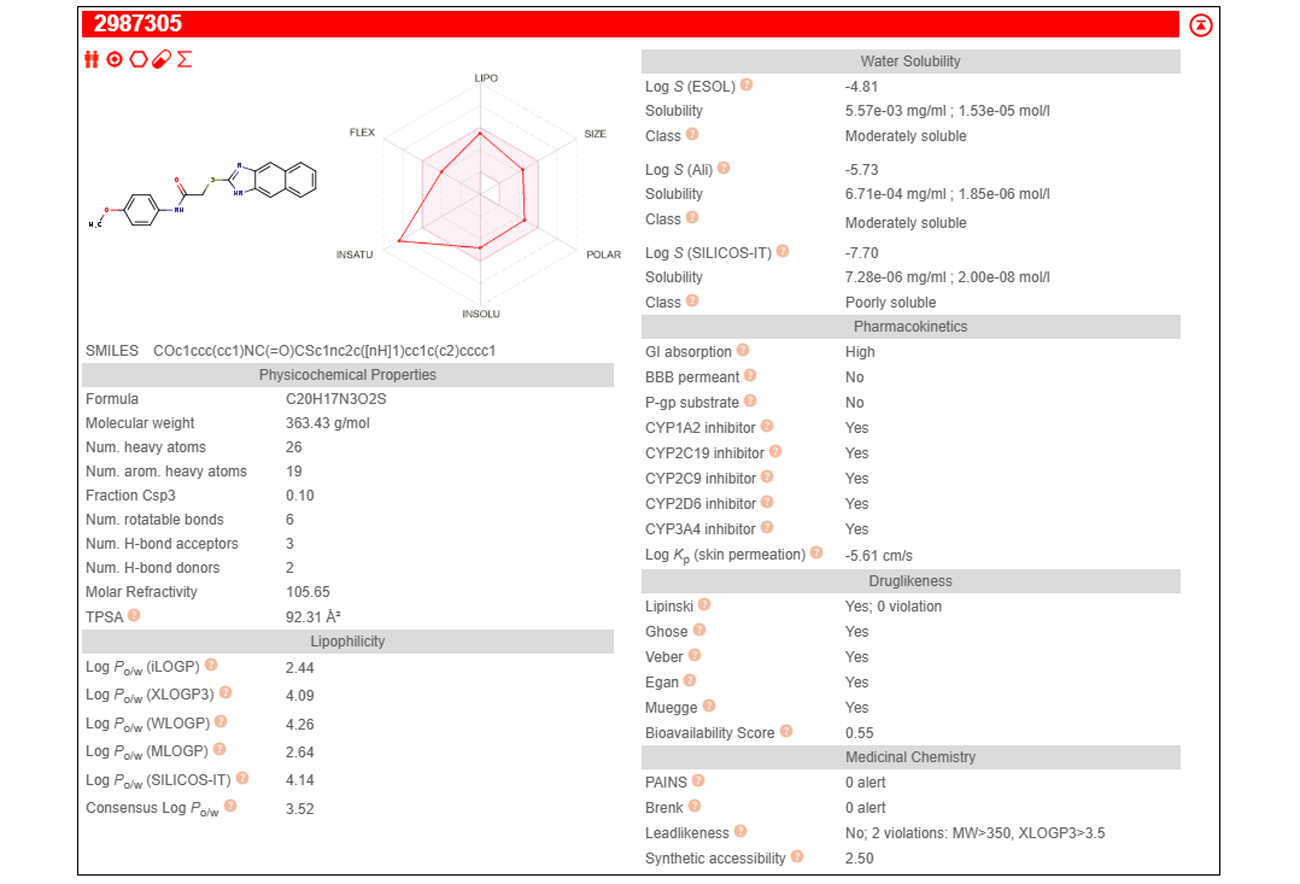


**Fig. S9**: Drug-likeness analysis of 2987305


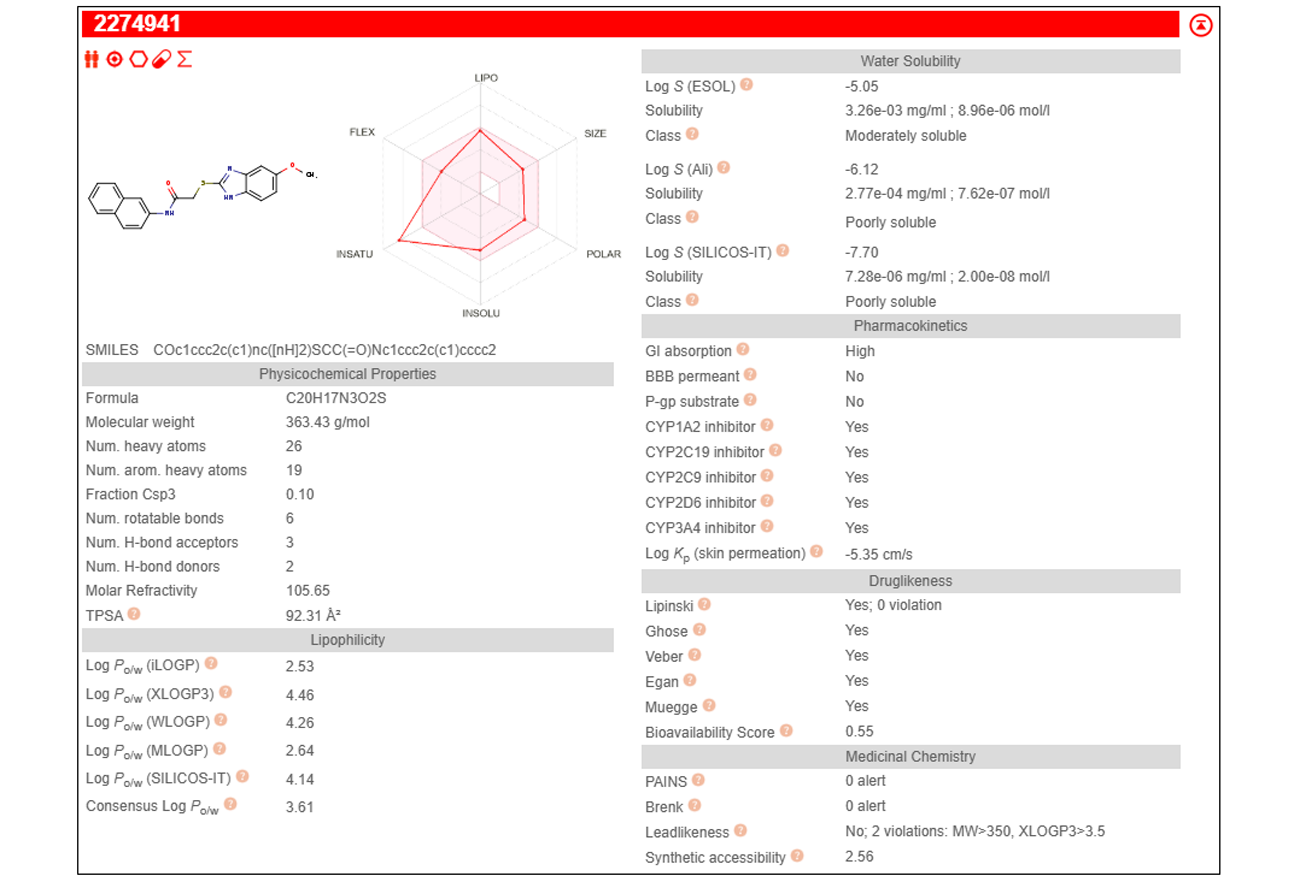


**Fig. S10**: Drug-likeness analysis of 2274941


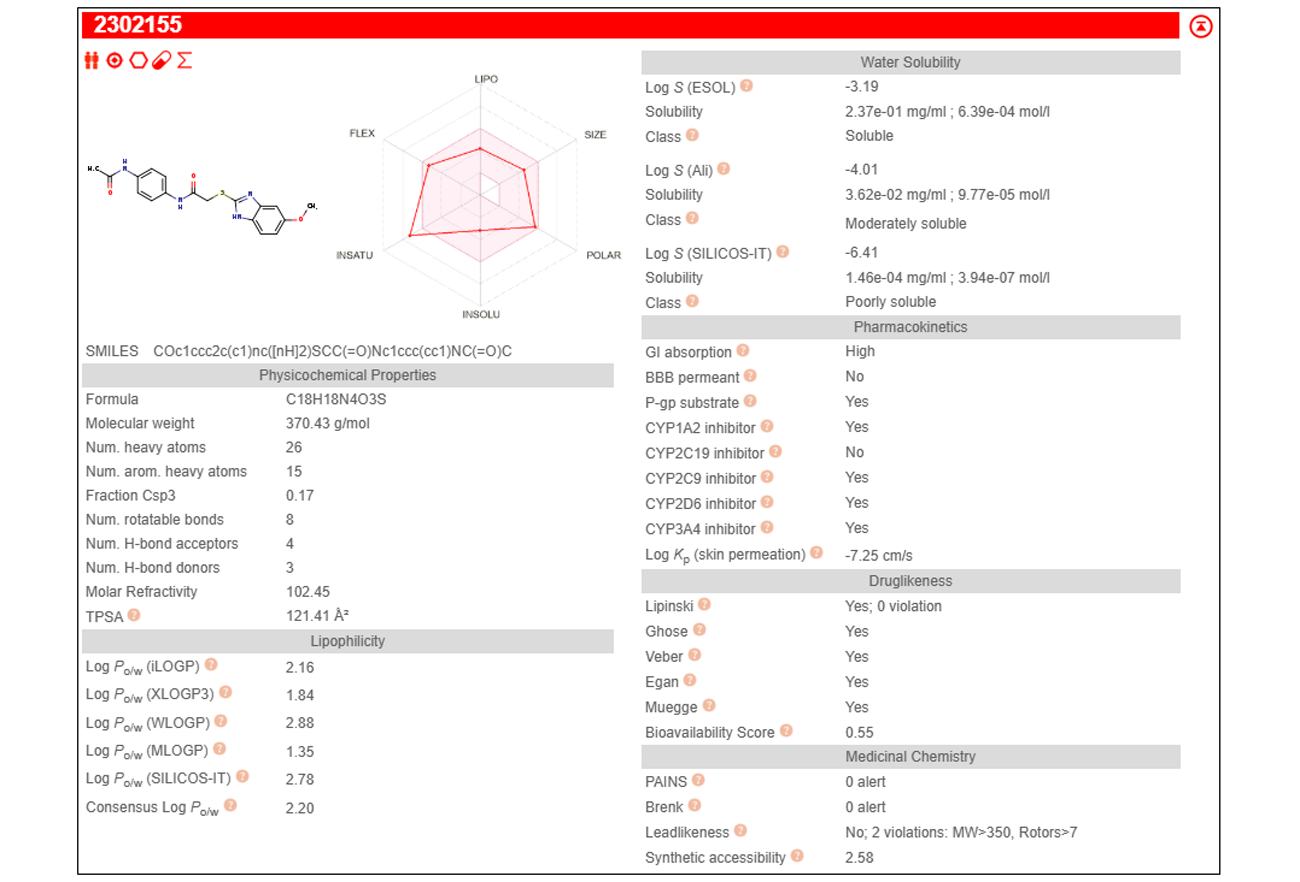


**Fig. S11**: Drug-likeness analysis of 2302155


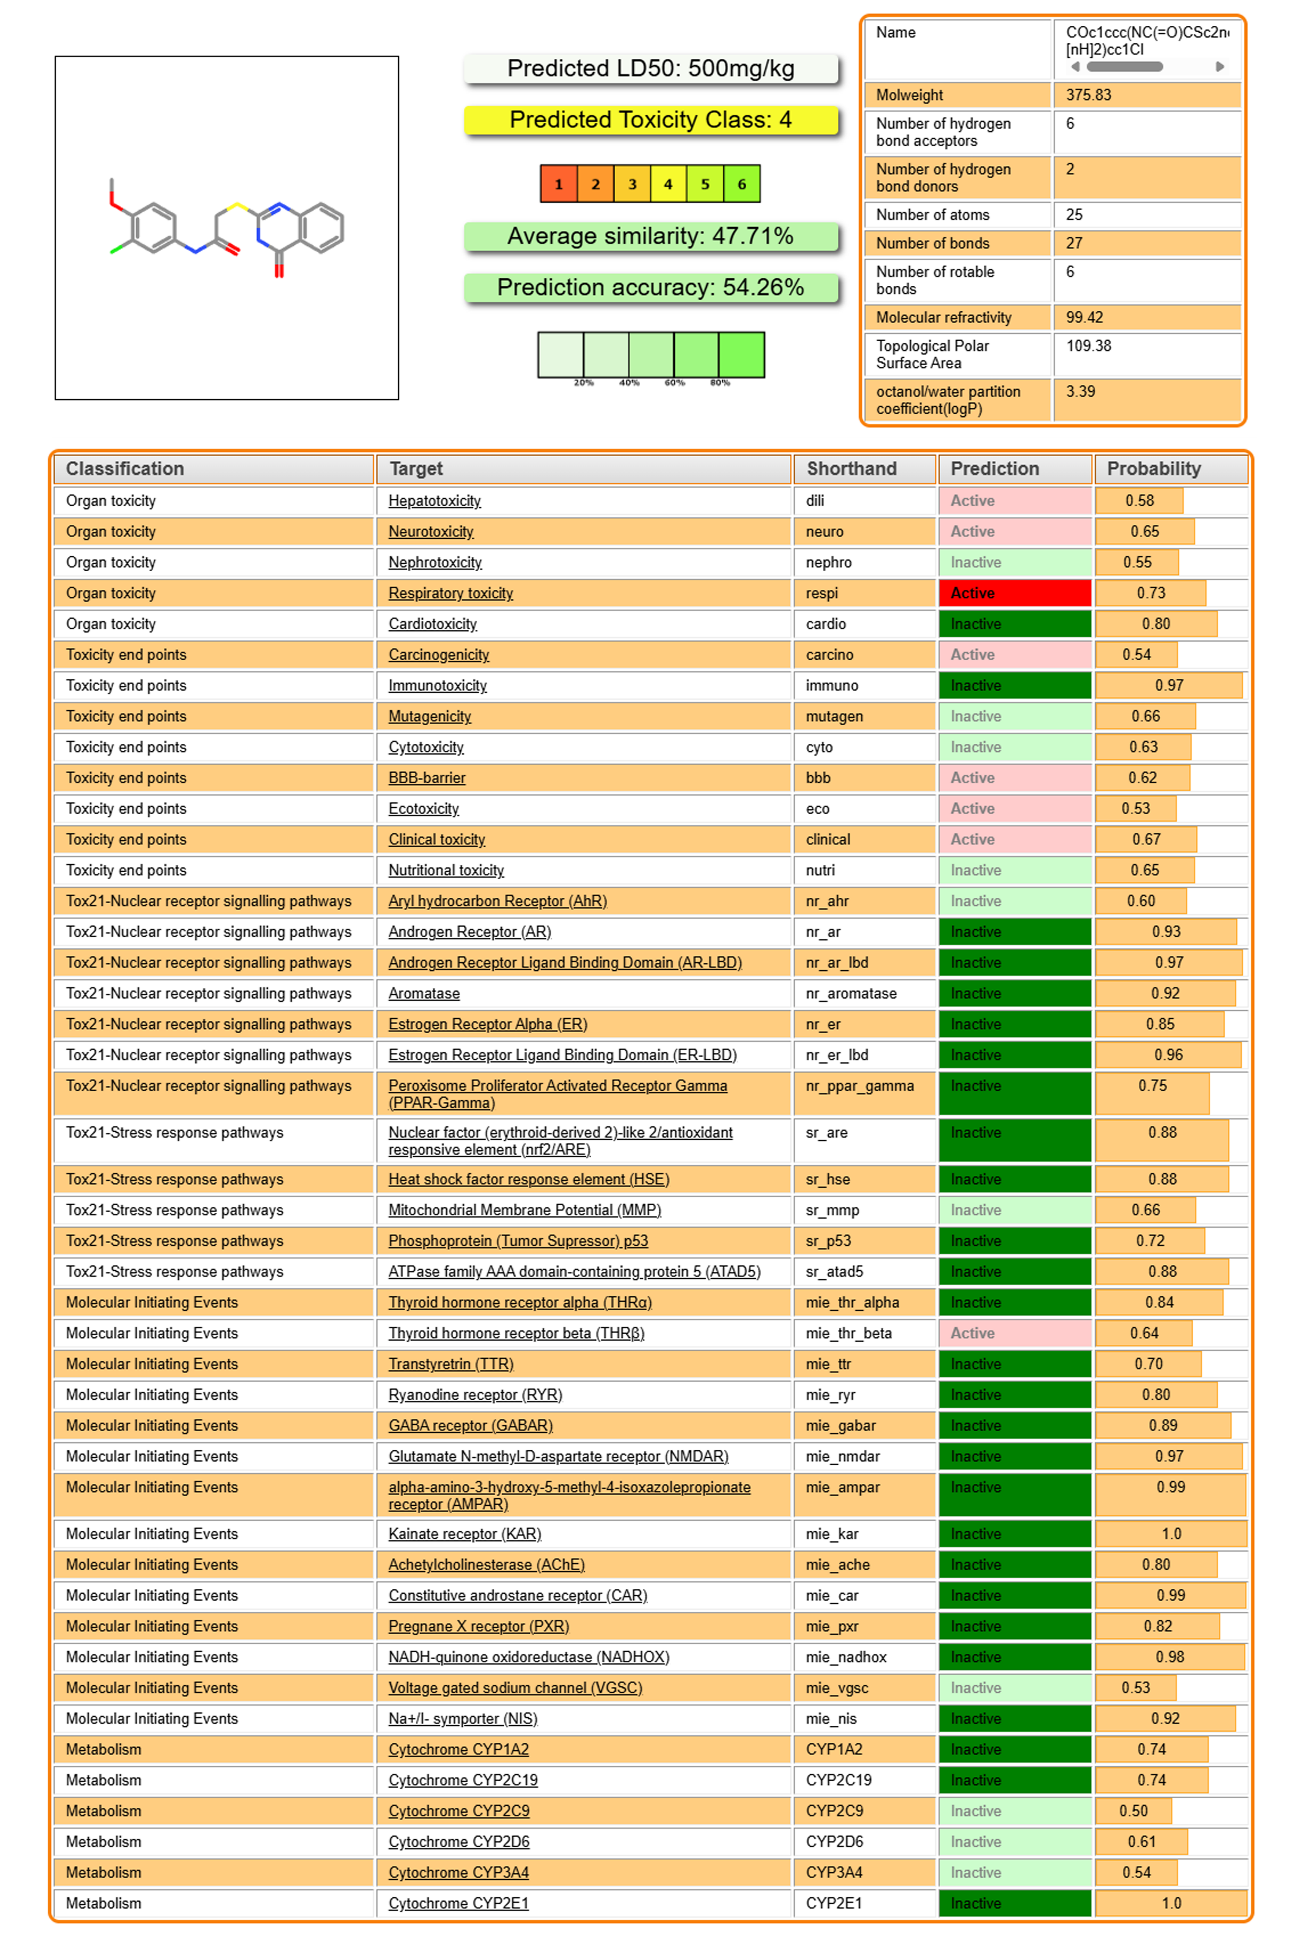


**Fig. S12**: Toxicity Prediction of 135476455


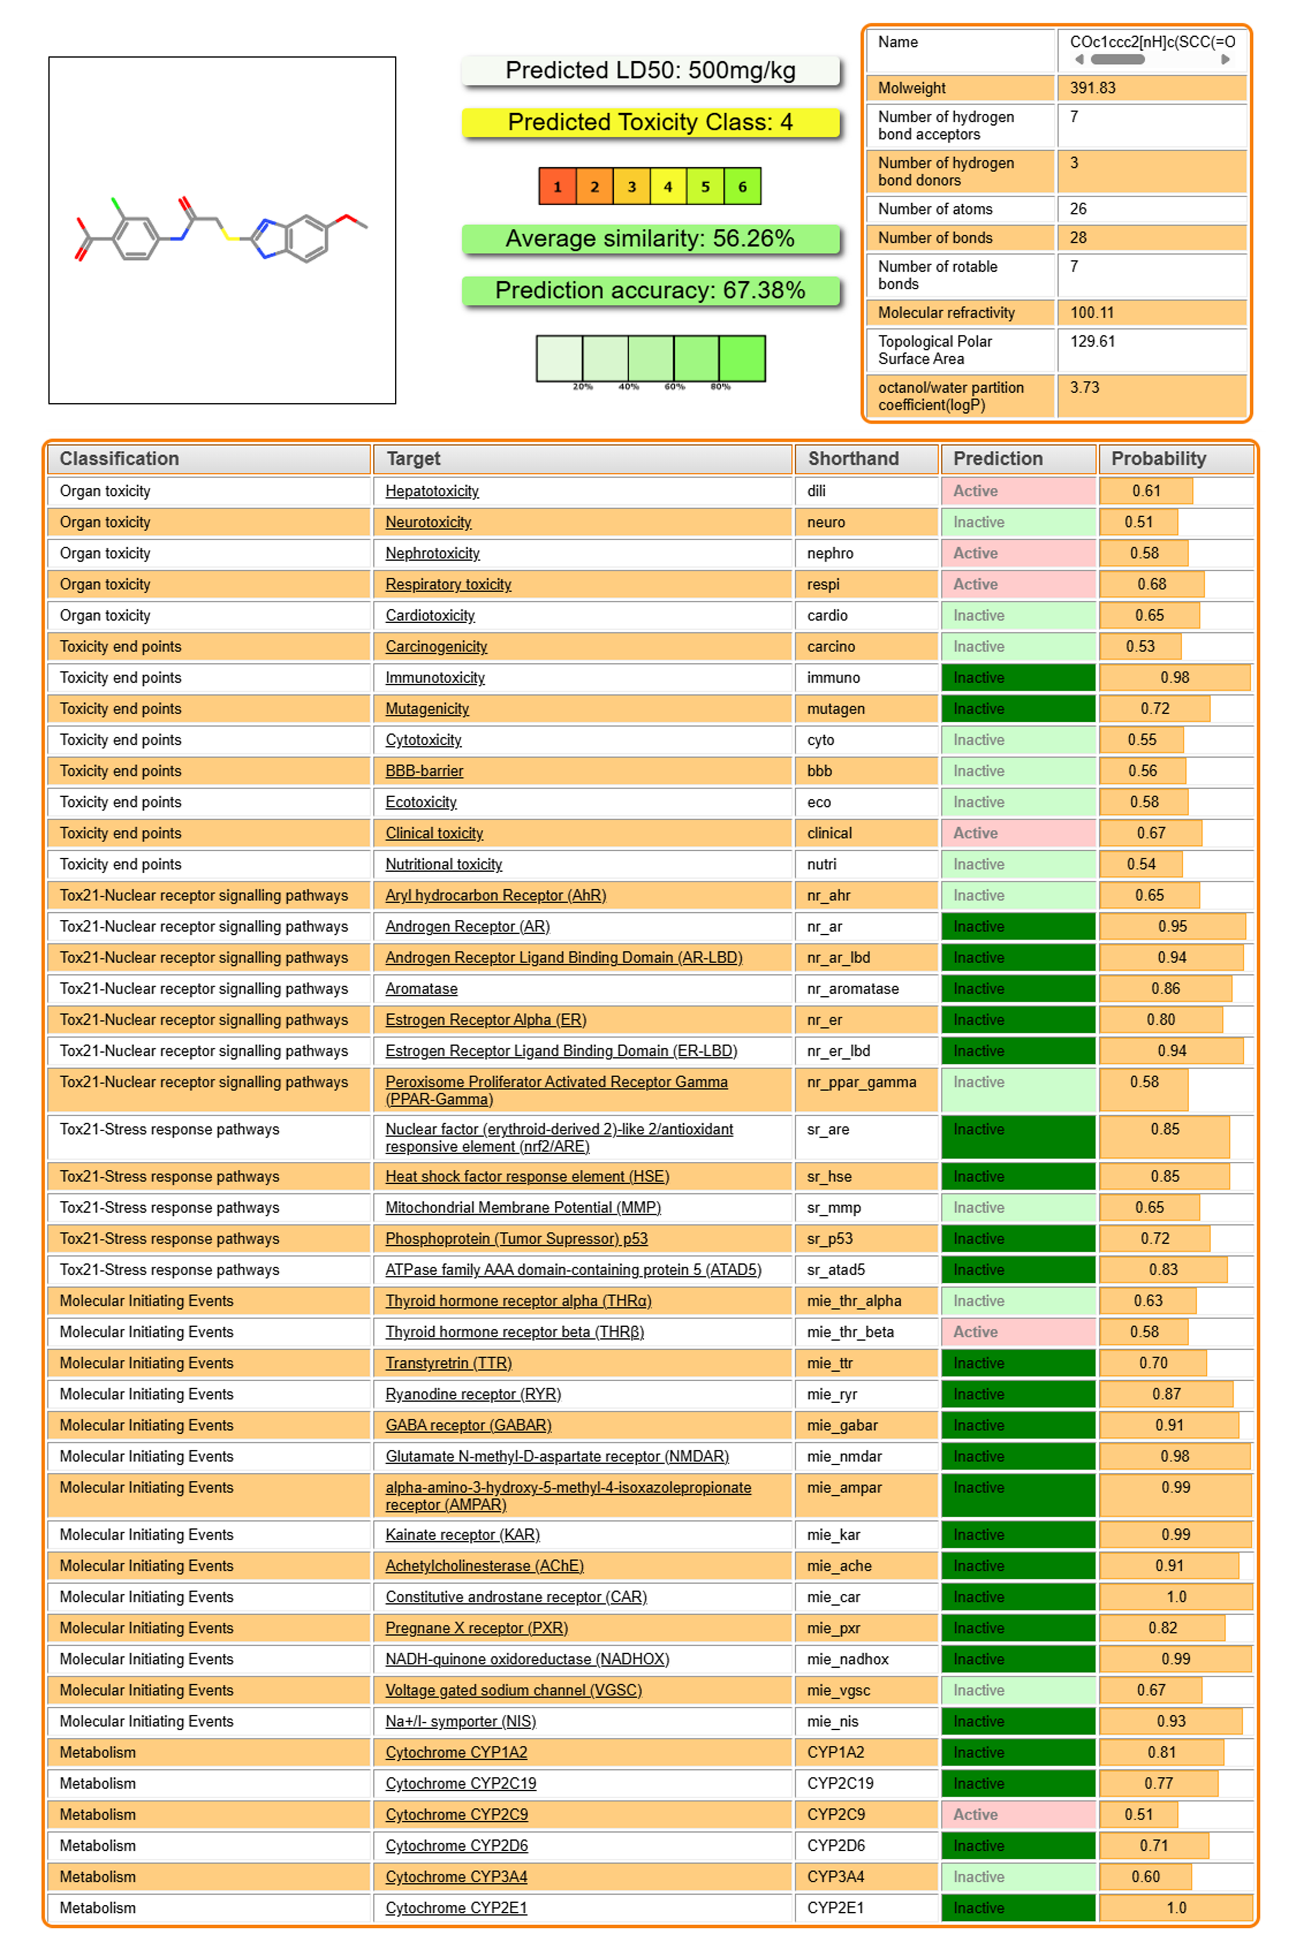


**Fig. S13**: Toxicity Prediction of 2166318


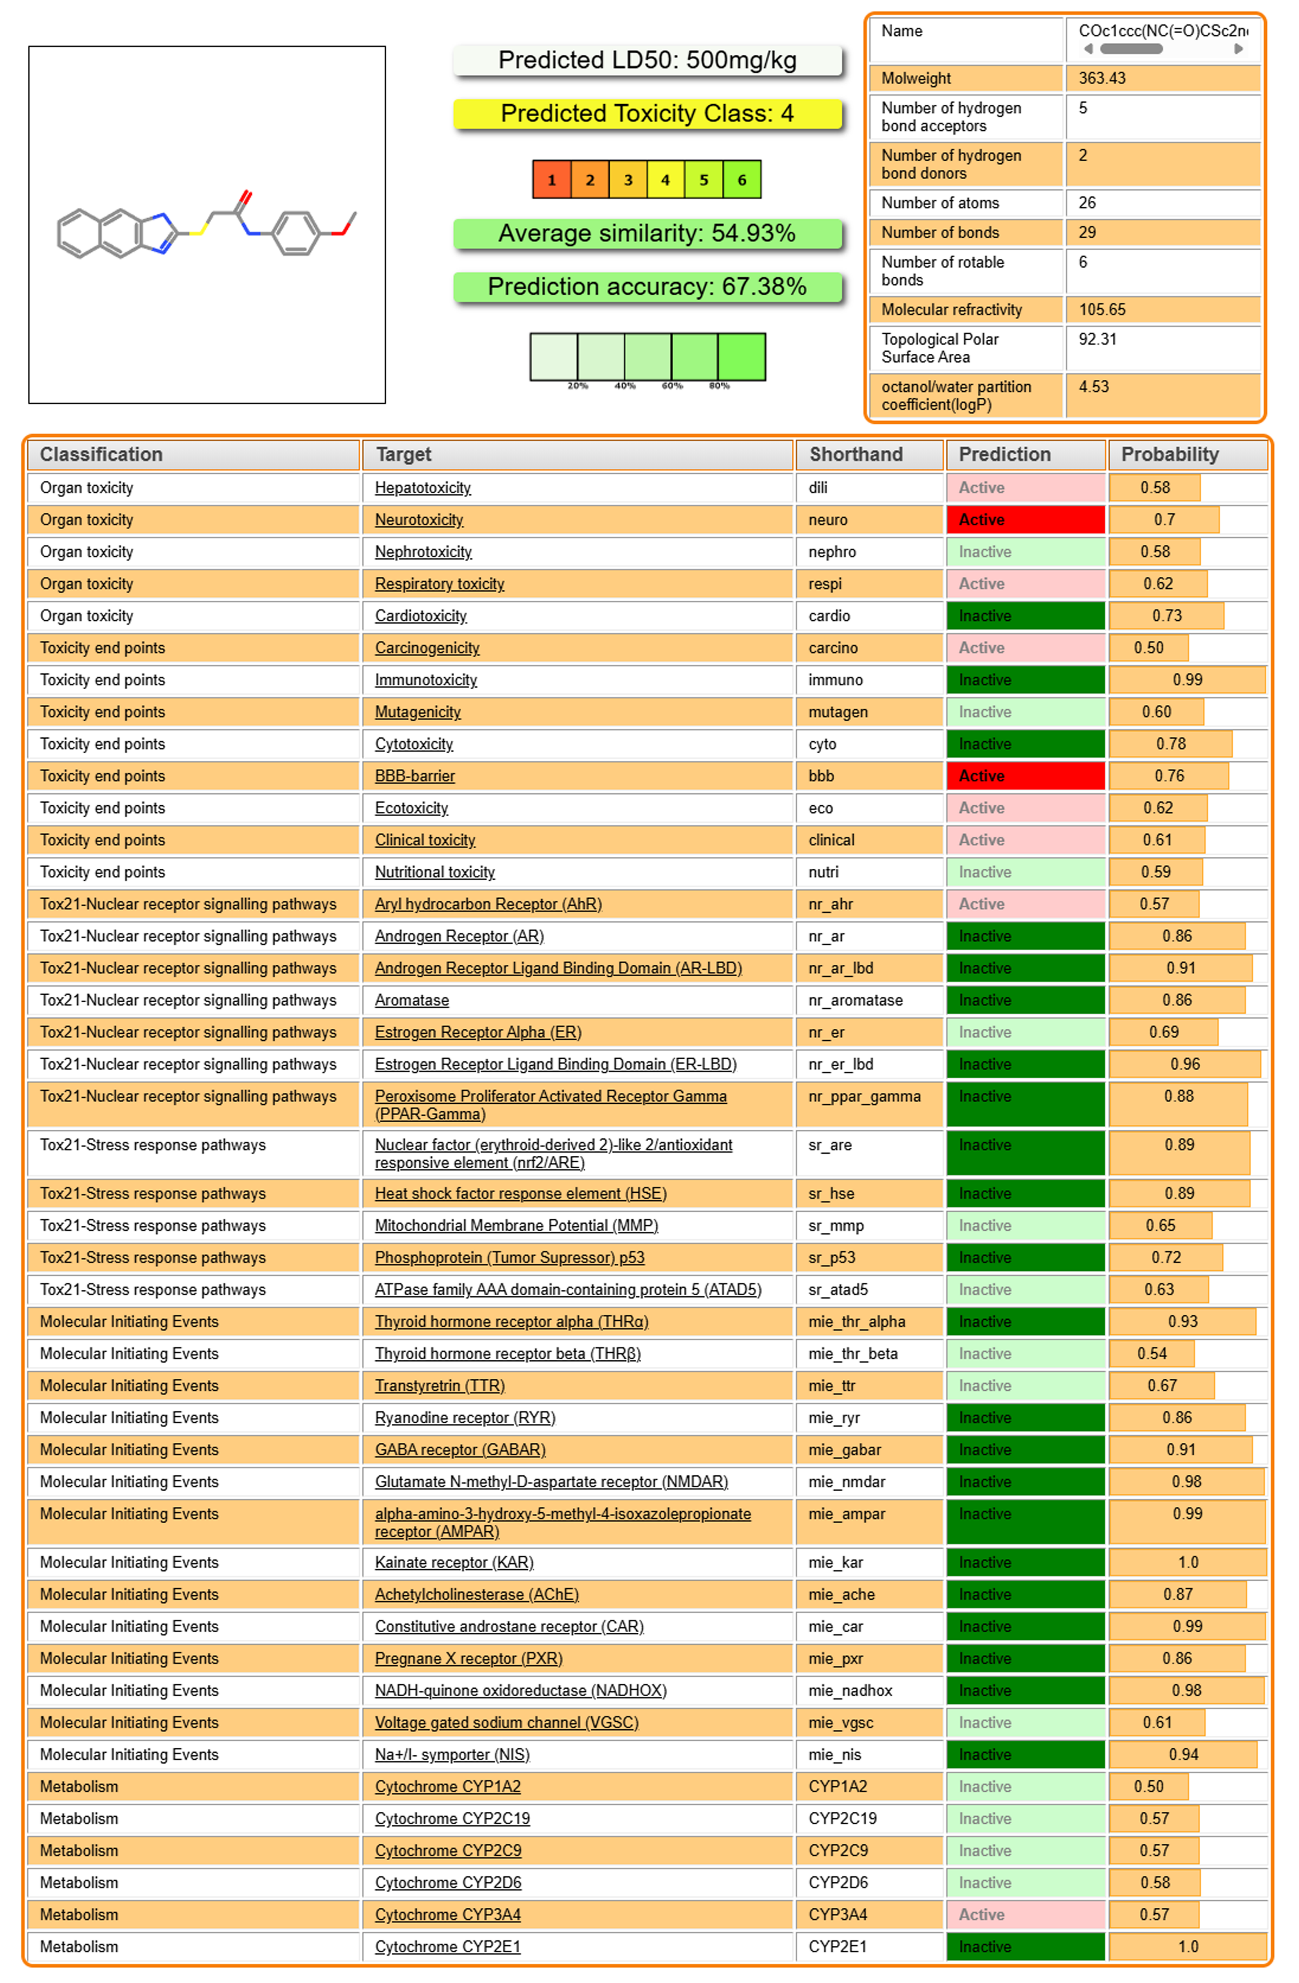


**Fig. S14**: Toxicity Prediction of 2987305


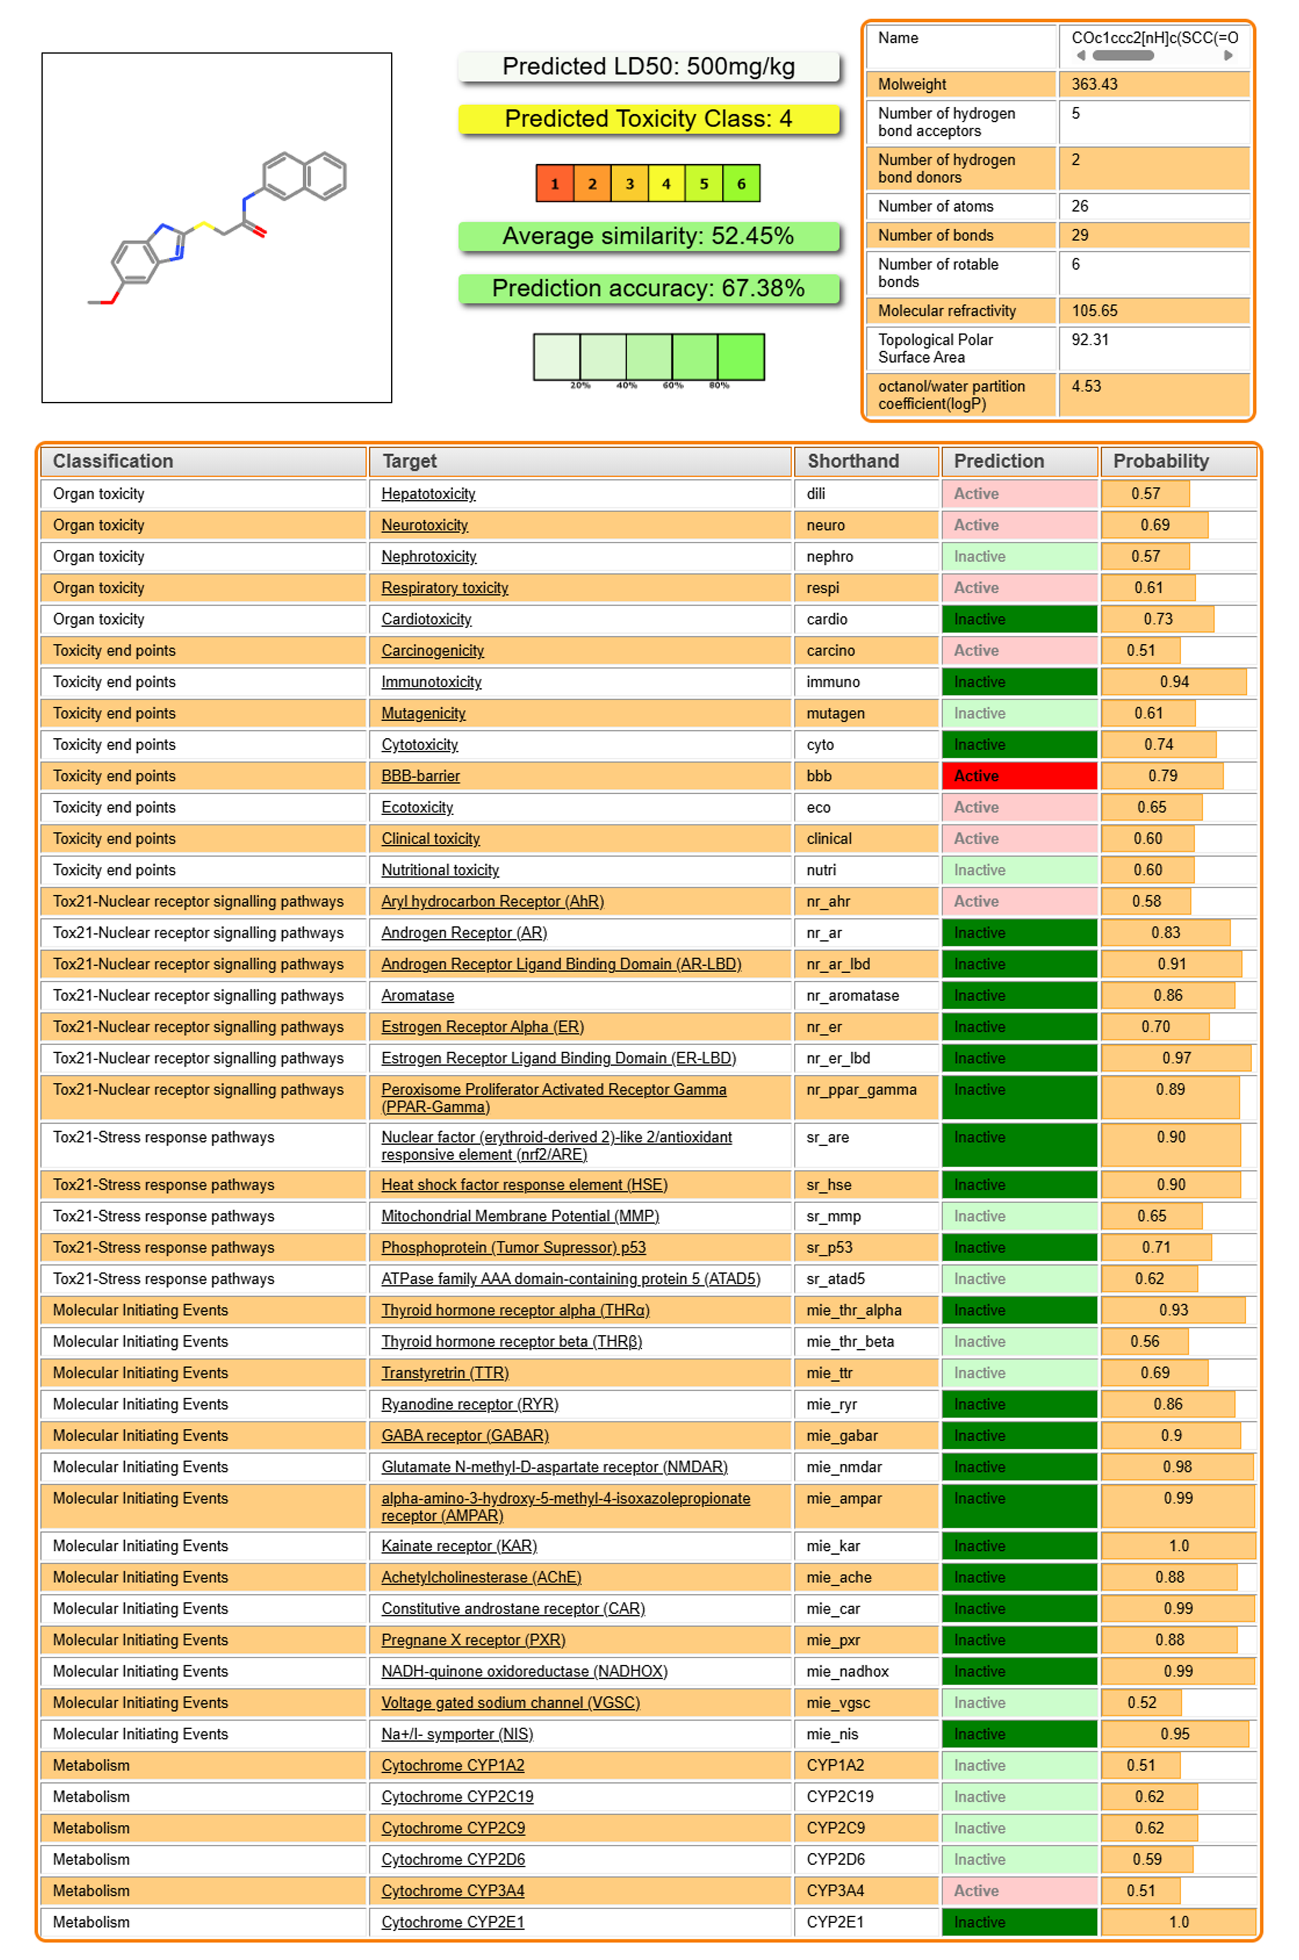


**Fig. S15**: Toxicity Prediction of 2274941


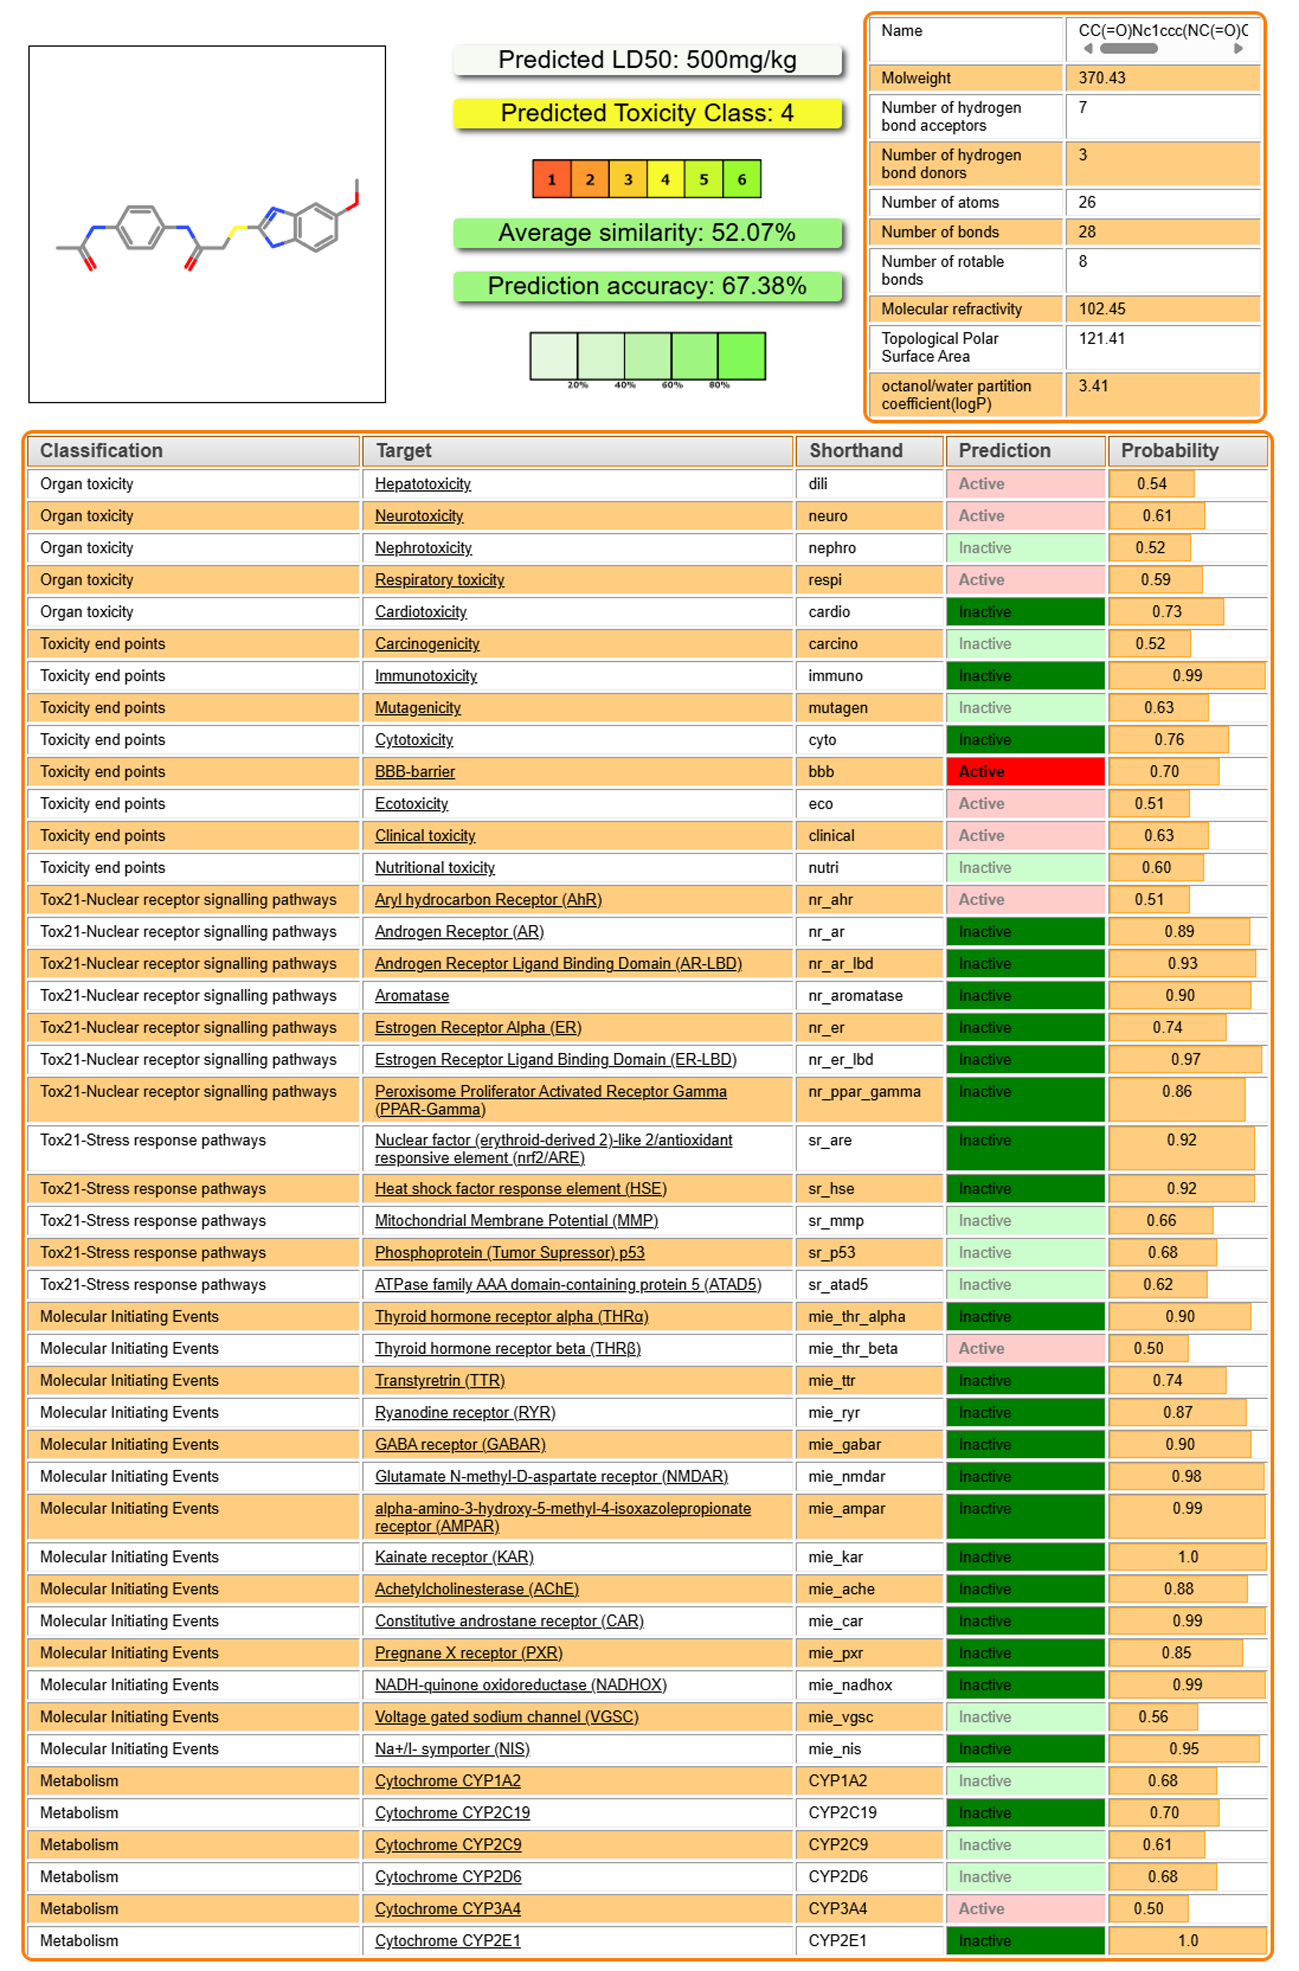


**Fig. S16**: Toxicity Prediction of 2302155
